# Supplementary material for: An organic–inorganic hybrid ferroelastic with a near-room-temperature phase transition
Source: Royal Society of Chemistry journal article supplement (doi:10.1039/d4dt03193h), 2024-12-23
Supplement: d4dt03193h1.pdf [file d4dt03193h1.pdf]

## Supporting Information

### **An organic-inorganic hybrid ferroelastic with near-room-temperature phase transition**

Yong-Ju Bai, Jun-Chao Qi, Ya-Ru Hou, Zhang-Tian Xia, Xin Shen, Hang Peng, Yan-Zi Lu, Yan Qin, Hui-Peng Lv\* and Wei-Qiang Liao\*

*Ordered Matter Science Research Center, Nanchang University, Nanchang 330031, People's Republic of China.*

*E-mail: huipenglv@ncu.edu.cn, liaowq@ncu.edu.cn.*

**Spontaneous strain tensor matrix of  $2/m\bar{1}$ -type phase transition:**

$$\varepsilon_{ij} = \begin{bmatrix} 0 & \varepsilon_{12} & 0 \\ 0 & 0 & \varepsilon_{23} \\ 0 & 0 & 0 \end{bmatrix}$$

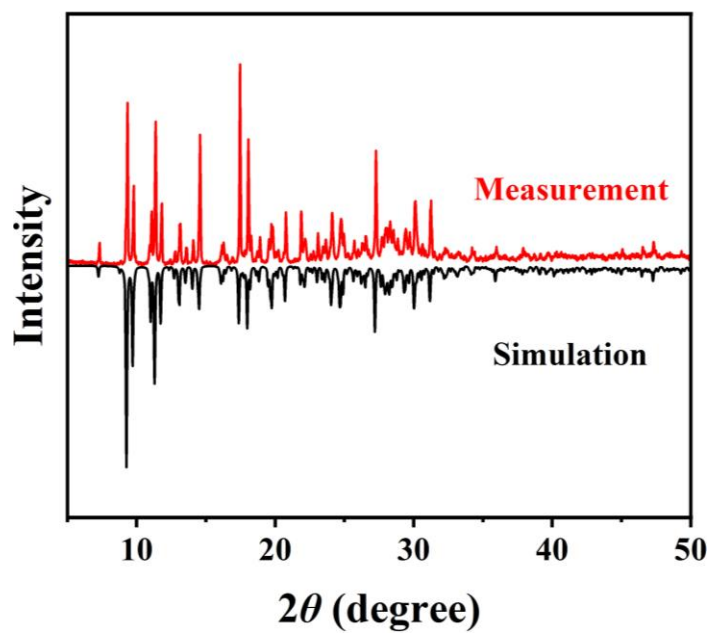

Fig. S1 The PXRD patterns of  $(E, E)$ -[BPHD]ZnBr<sub>4</sub> at 298 K.

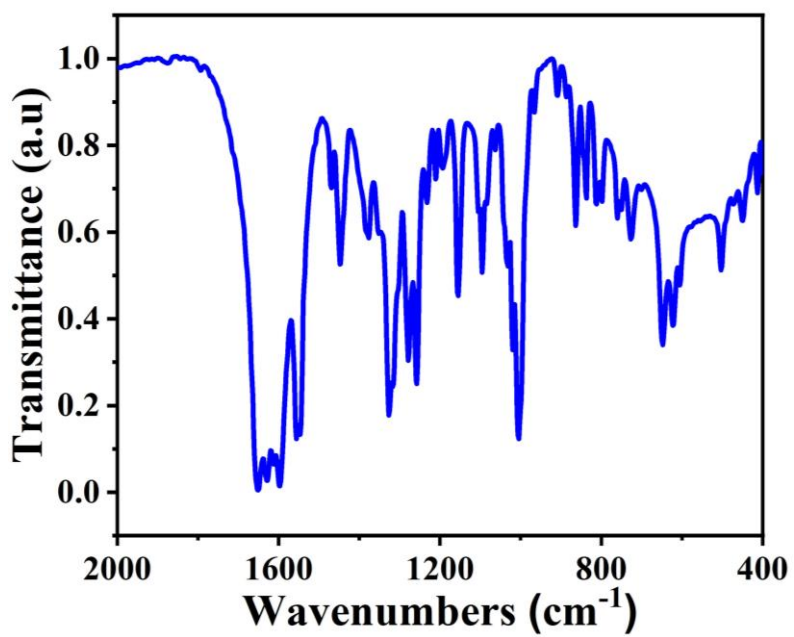

Fig. S2 The Infrared spectrums of  $(E, E)$ -[BPHD]ZnBr<sub>4</sub> at room temperature.

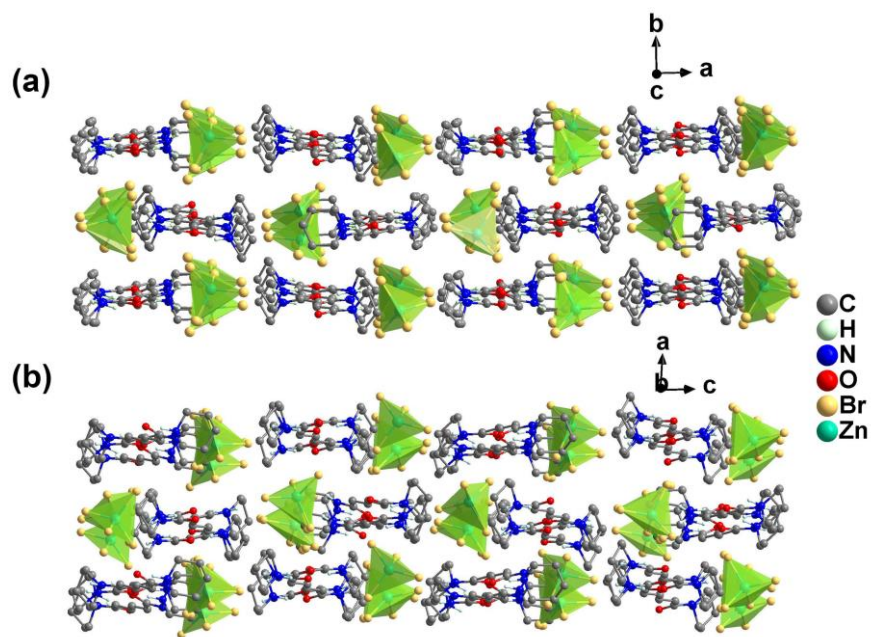

**Fig. S3** Packing view of  $(E, E)$ -[BPHD] $ZnBr_4$  in RTP (a) and LTP (b). Some hydrogen atoms are omitted for clarity.

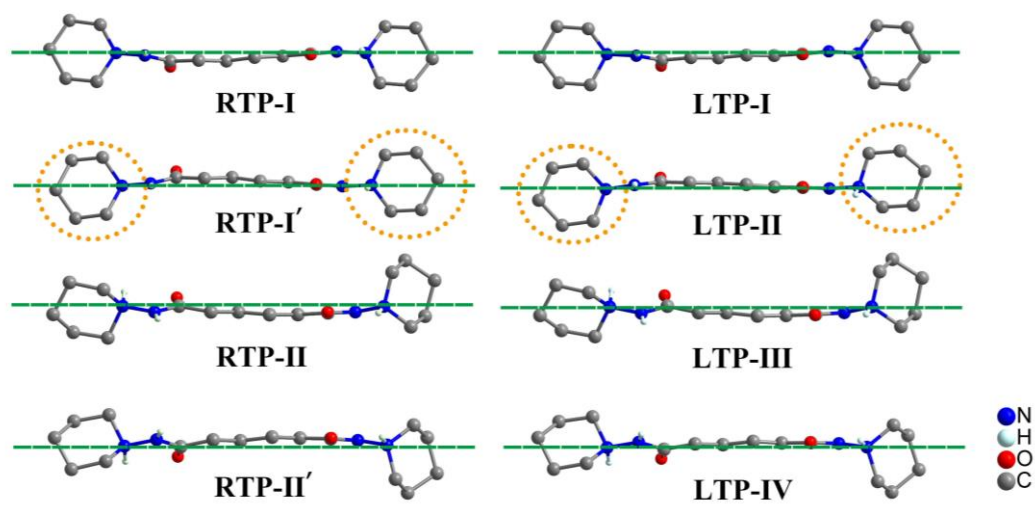

**Fig. S4** The cation structures of  $(E, E)$ -[BPHD] $ZnBr_4$  at 298 K and 233 K.

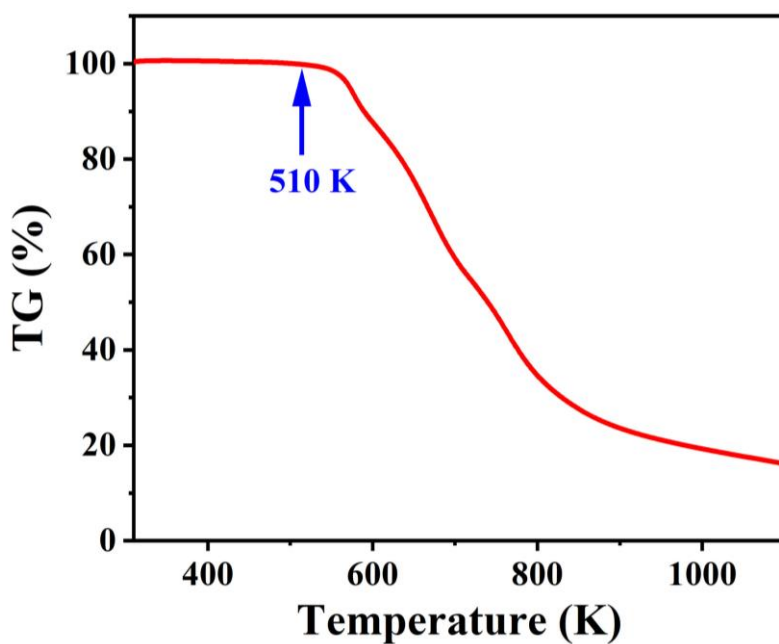

Fig. S5 The TGA curves of  $(E, E)$ -[BPHD]ZnBr<sub>4</sub>.

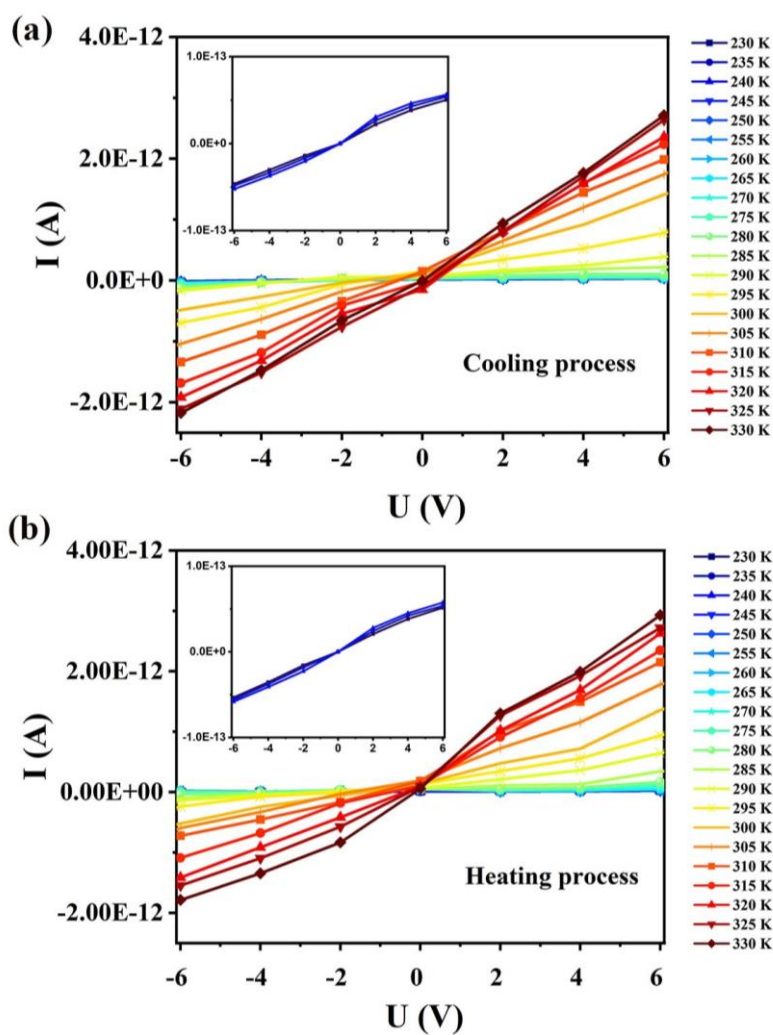

Fig. S6 I-V curves of  $(E, E)$ -[BPHD]ZnBr<sub>4</sub> in cooling (a) and heating (b) process. Inset: I-V curves at 230, 235 and 240 K.

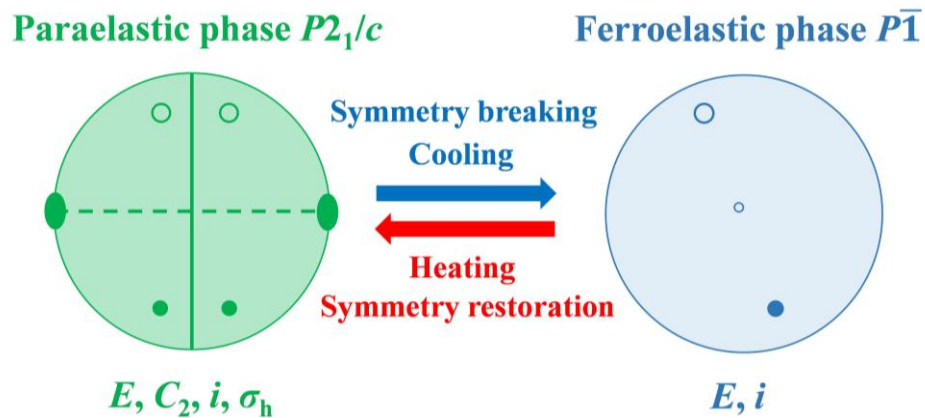

**Fig. S7** Symmetry breaking of  $(E, E)$ -[BPHD]ZnBr<sub>4</sub> from paraelastic phase  $P2_1/c$  to ferroelastic phase  $P\bar{1}$ .

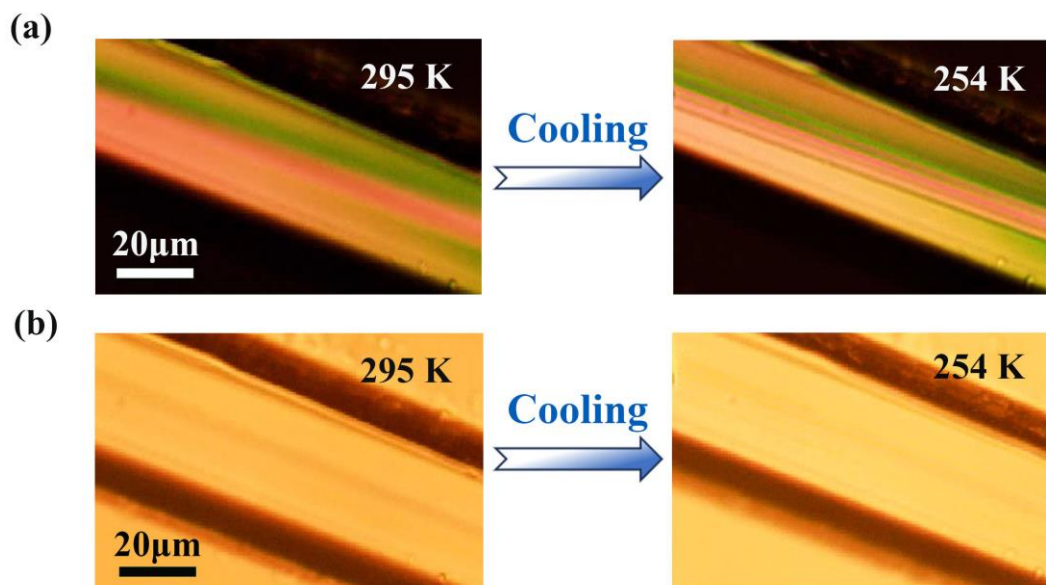

**Fig. S8** The domain patterns of  $(E, E)$ -[BPHD]ZnBr<sub>4</sub> under polarized light (a) and morphologies of  $(E, E)$ -[BPHD]ZnBr<sub>4</sub> under unpolarized light (b).

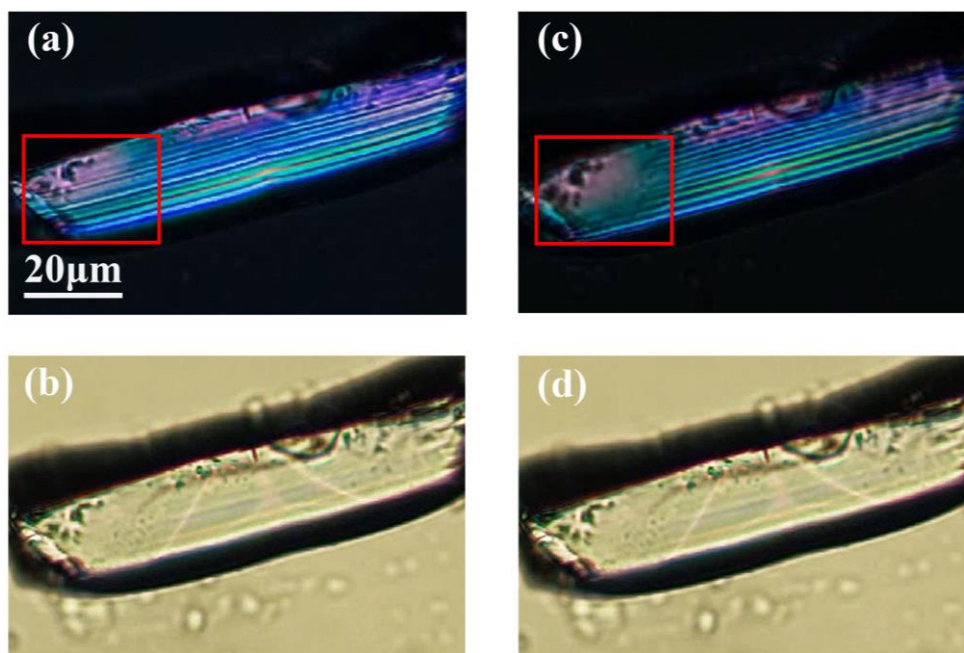

**Fig. S9** The domain pattern (a) and morphology (b) of  $(E, E)$ -[BPHD]ZnBr<sub>4</sub> before applying stress at 278 K; the domain pattern (c) and morphology (d) after applying stress on the left side.

**Table S1.** Crystal data and structure refinement of (*E, E*)-[BPHD]ZnBr<sub>4</sub> at 298 K and 233 K.

| Compound               | <i>(E, E)</i> -[BPHD]ZnBr <sub>4</sub>                                          |                                                                                 |
|------------------------|---------------------------------------------------------------------------------|---------------------------------------------------------------------------------|
| Temperature            | 298 K                                                                           | 233 K                                                                           |
| Formula                | C <sub>16</sub> H <sub>28</sub> N <sub>4</sub> O <sub>2</sub> ZnBr <sub>4</sub> | C <sub>16</sub> H <sub>28</sub> N <sub>4</sub> O <sub>2</sub> ZnBr <sub>4</sub> |
| Formula weight         | 693.43                                                                          | 693.43                                                                          |
| Crystal system         | monoclinic                                                                      | triclinic                                                                       |
| Space group            | <i>P</i> 2 <sub>1</sub> / <i>c</i>                                              | <i>P</i> $\bar{1}$                                                              |
| <i>a</i> /Å            | 25.8689(5)                                                                      | 10.1213(2)                                                                      |
| <i>b</i> /Å            | 10.2058(2)                                                                      | 20.2424(3)                                                                      |
| <i>c</i> /Å            | 20.2127(4)                                                                      | 25.7250(5)                                                                      |
| $\alpha$ /°            | 90                                                                              | 70.636(2)                                                                       |
| $\beta$ /°             | 109.232(2)                                                                      | 86.5060(10)                                                                     |
| $\gamma$ /°            | 90                                                                              | 89.6140(10)                                                                     |
| Volume/Å <sup>3</sup>  | 5038.60(18)                                                                     | 4962.63(17)                                                                     |
| <i>Z</i>               | 8                                                                               | 8                                                                               |
| <i>R</i> <sub>1</sub>  | 0.0826                                                                          | 0.0670                                                                          |
| <i>wR</i> <sub>2</sub> | 0.1724                                                                          | 0.1980                                                                          |
| GOF                    | 1.089                                                                           | 1.011                                                                           |

**Table S2.** Selected bond lengths/Å and bond angles/° for compound (*E, E*)-[BPHD]ZnBr<sub>4</sub> at 298 K.

| Temperature | Bond lengths |             | Bond angles  |             |
|-------------|--------------|-------------|--------------|-------------|
| 298K        | Zn1—Br1A     | 2.423 (5)   | Br1A—Zn1—Br2 | 98.0 (4)    |
|             | Zn1—Br1B     | 2.363 (4)   | Br1A—Zn1—Br3 | 118.4 (2)   |
|             | Zn1—Br2      | 2.413 (2)   | Br1A—Zn1—Br4 | 112.37 (12) |
|             | Zn1—Br3      | 2.3941 (19) | Br1B—Zn1—Br2 | 120.6 (4)   |
|             | Zn1—Br4      | 2.4332 (17) | Br1B—Zn1—Br3 | 103.4 (3)   |
|             | Zn2—Br5      | 2.4026 (19) | Br1B—Zn1—Br4 | 105.38 (18) |
|             | Zn2—Br6      | 2.411 (2)   | Br2—Zn1—Br4  | 110.33 (7)  |
|             | Zn2—Br7      | 2.3987 (16) | Br3—Zn1—Br2  | 106.34 (7)  |
|             | Zn2—Br8      | 2.3990 (18) | Br3—Zn1—Br4  | 110.41 (7)  |
|             |              |             | Br5—Zn2—Br6  | 108.69 (7)  |
|             |              |             | Br5—Zn2—Br7  | 110.83 (7)  |
|             |              |             | Br5—Zn2—Br8  | 106.78 (7)  |
|             |              |             | Br6—Zn2—Br7  | 110.18 (7)  |
|             |              |             | Br6—Zn2—Br8  | 109.13 (7)  |
|             |              | Br7—Zn2—Br8 | 111.14 (7)   |             |

**Table S3.** Selected bond lengths/Å and bond angles/° of hydrogen bonding for (*E, E*)-[BPHD]ZnBr<sub>4</sub> at 298 K.

| D—H···A                    | D—H  | H···A | D···A     | D—H···A |
|----------------------------|------|-------|-----------|---------|
| N4—H4···O1 <sup>i</sup>    | 0.98 | 1.92  | 2.857(9)  | 159.1   |
| N7—H7···Br7 <sup>ii</sup>  | 0.86 | 2.54  | 3.392(8)  | 171.2   |
| N5—H5···O4 <sup>iii</sup>  | 0.98 | 1.82  | 2.704(9)  | 148.5   |
| N2—H2···Br6 <sup>iii</sup> | 0.86 | 2.61  | 3.314(8)  | 139.6   |
| N1—H1···O2 <sup>iv</sup>   | 0.98 | 1.91  | 2.856(9)  | 161.7   |
| N3—H3···Br4 <sup>v</sup>   | 0.86 | 2.45  | 3.298(8)  | 168.6   |
| N8—H8···O3 <sup>vi</sup>   | 0.98 | 2.19  | 3.058(10) | 147.5   |

Symmetry codes: <sup>i</sup>+X,-1/2-Y,-1/2+Z; <sup>ii</sup>1-X,-1/2+Y,1/2-Z; <sup>iii</sup>+X,1/2-Y,1/2+Z; <sup>iv</sup>+X,-1/2-Y,1/2+Z; <sup>v</sup>-X,-1/2+Y,1/2-Z; <sup>vi</sup>+X,1/2-Y,-1/2+Z

**Table S4.** Selected bond lengths/Å and bond angles/° for compound (*E, E*)-[BPHD]ZnBr<sub>4</sub> at 233 K.

| Temperature | Bond lengths |               | Bond angles   |            |
|-------------|--------------|---------------|---------------|------------|
| 233K        | Br1—Zn1      | 2.4441(13)    | Br2—Zn1—Br1   | 109.70(6)  |
|             | Br2—Zn1      | 2.4052(15)    | Br2—Zn1—Br3A  | 120.54(9)  |
|             | Zn1—Br3A     | 2.433(2)      | Br2—Zn1—Br4   | 105.39(5)  |
|             | Zn1—Br4      | 2.4237(16)    | Br3A—Zn1—Br1  | 110.75(7)  |
|             | Zn1—Br3B     | 2.368(3)      | Br4—Zn1—Br1   | 111.89(5)  |
|             | Br9—Zn3      | 2.4034(13)    | Br4—Zn1—Br3A  | 97.76(11)  |
|             | Br10—Zn3     | 2.4092(14)    | Br3B—Zn1—Br1  | 102.90(11) |
|             | Br11—Zn3     | 2.3980(12)    | Br3B—Zn1—Br2  | 101.85(18) |
|             | Br12—Zn3     | 2.4083(14)    | Br3B—Zn1—Br4  | 124.3(2)   |
|             | Br5—Zn2      | 2.406(4)      | Br9—Zn3—Br10  | 106.15(5)  |
|             | Br6—Zn2      | 2.4111(13)    | Br9—Zn3—Br12  | 108.58(5)  |
|             | Br7—Zn2      | 2.4207(12)    | Br11—Zn3—Br9  | 111.27(5)  |
|             | Br8—Zn2      | 2.4218(13)    | Br11—Zn3—Br10 | 110.38(5)  |
|             | Zn2—Br5A     | 2.355(6)      | Br11—Zn3—Br12 | 111.87(5)  |
|             | Br13—Zn4     | 2.4175(14)    | Br12—Zn3—Br10 | 108.39(6)  |
|             | Br14—Zn4     | 2.4024(13)    | Br5—Zn2—Br6   | 116.3(2)   |
|             | Br15—Zn4     | 2.4005(12)    | Br5—Zn2—Br7   | 110.91(15) |
|             | Br16—Zn4     | 2.4040(14)    | Br5—Zn2—Br8   | 102.4(4)   |
|             |              |               | Br6—Zn2—Br7   | 110.63(5)  |
|             |              |               | Br6—Zn2—Br8   | 105.83(5)  |
|             |              | Br7—Zn2—Br8   | 110.18(5)     |            |
|             |              | Br5A—Zn2—Br6  | 107.1(5)      |            |
|             |              | Br5A—Zn2—Br7  | 106.0(3)      |            |
|             |              | Br5A—Zn2—Br8  | 117.0(8)      |            |
|             |              | Br14—Zn4—Br13 | 109.86(5)     |            |
|             |              | Br14—Zn4—Br16 | 107.27(5)     |            |
|             |              | Br15—Zn4—Br13 | 109.59(5)     |            |



|               |           |
|---------------|-----------|
| Br15—Zn4—Br14 | 110.76(5) |
| Br15—Zn4—Br16 | 110.88(5) |

**Table S5.** Selected bond lengths/Å and bond angles/° of hydrogen bonding for (*E, E*)-[BPHD]ZnBr<sub>4</sub> at 233 K.

| <b>D—H···A</b>               | <b>D—H</b> | <b>H···A</b> | <b>D···A</b> | <b>D—H···A</b> |
|------------------------------|------------|--------------|--------------|----------------|
| N5—H5···O4                   | 0.99       | 1.89         | 2.838(7)     | 159.0          |
| N6—H6···Br1                  | 0.87       | 2.46         | 3.334(6)     | 177.4          |
| N8—H8A···O3 <sup>1</sup>     | 0.99       | 1.92         | 2.871(8)     | 160.1          |
| N13—H13···O8 <sup>1</sup>    | 0.99       | 2.16         | 3.041(8)     | 147.8          |
| N14—H14···Br15               | 0.87       | 2.53         | 3.395(6)     | 171.5          |
| N16—H16···O7                 | 0.99       | 1.84         | 2.726(7)     | 147.7          |
| N9—H9A···O6                  | 0.99       | 2.27         | 3.131(8)     | 145.4          |
| N10—H10A···Br11 <sup>3</sup> | 0.87       | 2.54         | 3.406(6)     | 171.4          |
| N12—H12···O5 <sup>3</sup>    | 0.99       | 1.83         | 2.738(7)     | 150.7          |
| N1—H1···O1                   | 0.99       | 1.90         | 2.857(7)     | 161.2          |
| N2—H2···Br13                 | 0.87       | 2.53         | 3.289(6)     | 145.8          |
| N3—H3···Br7                  | 0.87       | 2.55         | 3.324(6)     | 148.9          |
| N4—H4···O2 <sup>3</sup>      | 0.99       | 1.89         | 2.834(7)     | 158.4          |

Symmetry codes: <sup>1</sup>+X, -1+Y, +Z; <sup>2</sup>1-X, -Y, -Z; <sup>3</sup>+X, 1+Y, +Z
